# Supplementary material
Source: publisher site journal article supplement (https://www.dovepress.com/article/417431)
Supplement: Supplementary file 1 [file get_supplementary_file.php]

Supplementary Figure 1: Heatmap of the correlations between all the variables.



(A)



(B)

Supplementary Figure 2: LASSO coefficient profiles of the factors, using cross-validation to determine the optimal penalty parameter lambda.

(A) The results of the LASSO regression analysis of dependent variables. (B) The 12 factors that exhibited significant differences between the patients with SSI and those without SSI.

### Top 10 – variable importance



(A)



(B)

Supplementary Figure 3: (A) The ten factors were selected as diagnostic models after SVM-RFE calculation.

(B) The 10 most important factors calculated using the random forest algorithm 'IncNodePurity'.
